# Supplementary material
Source: Elsevier journal article supplement (https://www.sciencedirect.com/science/article/pii/S1578219020301517)
Supplement: mmc1 [file S1578219020301517:mmc1.docx]

**Anexo**

**Tabla 1.**  Definición de las variables: “*Consensus statement on definitions of disease, end points, and therapeutic response for pemphigus*” y guía de recomendaciones de expertos del 2018.

| Remisión completa con/sin tratamiento13,16 | Ausencia de lesiones por un lapso de al menos 2 meses mientras el paciente recibía dosis equivalentes a terapia mínima o estaba libre de tratamiento |
| --- | --- |
| Recaída13,16 | Aparición de 3 o más lesiones que no resolvieron en forma espontánea en una semana o a la extensión de lesiones conocidas |
| Terapia mínima13,16 | Requerimiento de dosis iguales o inferiores a 10 mg/día de prednisona, sus equivalentes o la mitad de la dosis plena del FA durante 2 meses |
| Corticodependencia17 | Imposibilidad para descender la dosis de GS por debajo de la terapia mínima, sin que se produzcan recaídas |
| Refractariedad13,16 | Existencia de recaídas pese a dosis plenas en un mínimo período de tiempo según los fármacos utilizados |

FA: fármacos ahorradores; GS: glucocorticoides sistémicos

**Tabla 2.** Características demográficas y clínicas de los pacientes con PV (n=32)

| **N (%) o Mediana (RIC)** | | | |
| --- | --- | --- | --- |
|  | **Grupo total** | **Mujeres** | **Varones** |
| **Sexo** |  | 19 (59) | 13 (41) |
| **Edad al diagnóstico, años** | 49 (40-63) | 50 (39-65) | 48 (41-62) |
| **Forma de inicio**  - Mucoso  - Cutáneo  - Cutáneo-mucoso | 20 (63)  5 (16)  7 (22) | 15 (79)  2 (11)  2 (11) | 5 (39)  3 (23)  5 (39) |
| **Membranas mucosas**  - Compromiso mucoso  - Más de 1 mucosa | 32 (100)  14 (44) | 19 (100)  9 (47) | 13 (100)  5 (39) |
| **Cutáneo**  - Compromiso cutáneo  - Más de 1 región topográfica  - Cara  - Cuero cabelludo  - Tronco  - Extremidades | 28 (88)  25/28 (89)  15/28 (54)  15/28 (54)  22/28 (79)  22/28 (79) | 16 (84)  14/16 (88)  7/16 (44)  7/16 (44)  13/16 (81)  14/16 (88) | 12 (92)  11/12 (92)  8/12 (67)  8/12 (67)  9/12 (75)  8/12 (67) |

RIC: rango intercuartílico.

**Tabla 3.** Tratamiento y evolución de los pacientes con PV (n=32)

| **N (%) o Mediana (RIC)** | | | |
| --- | --- | --- | --- |
|  | **Grupo total** | **Mujeres** | **Varones** |
| **Tratamiento GS**  - Dosis inicial meprednisona  <0,5 mg/kg/día  ≥0,5-0,75 mg/kg/día  ≥0,75-1 mg/kg/día  ≥1-1,5 mg/kg/día  ≥1,5-<2,5 mg/kg/día  ≥2,5 mg/kg/día  - Aumento de dosis  - Duración de tratamiento, meses  - Falta de suspensión  - Corticodependencia | 3 (9)  7 (22)  3 (9)  14 (44)  3 (9)  2 (6)  26 (81)  35 (11-74)  19/31 (61)  8 (25) | 2 (11)  3 (16)  3 (16)  9 (47)  2 (11)  0  15 (79)  35 (11-83)  14/19 (74)  6 (32) | 1 (8)  4 (31)  0  5 (38)  1 (8)  2 (15)  11 (85)  31 (6-74)  5/12 (42)  2 (15) |
| **Tratamiento FA**  - Requerimiento  - Tratamientos/paciente | 30 (94)  2 (1-3) | 17 (90)  2 (1-3) | 13 (100)  1 (1-3) |
| **Refractarios** | 9 (28) | 5 (26) | 4 (31) |
| **Complicaciones** | 30 (94) | 17 (90) | 13 (100) |
| **Ingresos hospitalarios**  -Requerimiento de ingresos hospitalarios  -Ingresos hospitalarios/paciente  -Ingresos hospitalarios para infusión de tratratamientos | 18 (53)  3 (1-5)  11/18 (61) | 12 (63)  3 (2-6)  8/12 (67) | 6 (46)  2 (1-3)  3/6 (50) |
| **Recaídas**  - Recaídas  - Recaídas/paciente  - Tiempo a la primer recaída, meses | 26 (81)  2 (1-5)  12 (4-34) | 15 (79)  2 (1-4)  12 (3-23) | 11 (85)  2 (1-7)  12 (4-46) |
| **Remisión con/sin tratamiento** | 15 (47) | 9 (47) | 6 (46) |
| **Tiempo libre de enfermedad, meses** | 14 (4-23) | 7 (2-23) | 16 (9-17) |
| **Muertes**  - Muertes  - Relación directa con PV  - Tiempo a la muerte, meses | 2 (6)  1 (50)  32 (27-37) | 2 (11)  1 (50)  32 (27-37) | 0  0  0 |

GS: glucocorticoides sistémicos; PV: pénfigo vulgar; RIC: rango intercuartílico.

**Tabla 4.** Tratamiento con rituximab (n=12)

|  | Año  1°  ciclo | I  1°  ciclo | Año  2° ciclo | I  2°  ciclo | Año  3°  ciclo | I  3°  Ciclo | Año  4°  ciclo | I  4°  Ciclo | N°  ciclos | M  6 m | M  12 m | Recaída | Remisión | Suspensión  GS | FA tras rituximab |
| --- | --- | --- | --- | --- | --- | --- | --- | --- | --- | --- | --- | --- | --- | --- | --- |
| 1 | 2010 | R | - | - | - | - | - | - | 1 | - | - | Si | No | No | AZA/MM |
| 2 | 2010 | C | - | - | - | - | - | - | 1 | - | - | PS | PS | PS | - |
| 3 | 2010 | R | 2011 | Persistencia | 2013 | Recaída | 2016 | Recaída | 4 | Si | No | Si | No | No | - |
| 4 | 2011 | C | - | - | - | - | - | - | 1 | - | - | PS | PS | PS | - |
| 5 | 2012 | R | - | - | - | - | - | - | 1 | - | - | PS | PS | PS | - |
| 6 | 2013 | R | 2015 | Recaída | 2016 | Pautado | - | - | 3 | Si | No | Si | Si | No | - |
| 7 | 2014 | C | 2015 | Pautado | - | - | - | - | 2 | No | Si | No | Si | No | - |
| 8 | 2015 | C | - | - | - | - | - | - | 1 | - | - | Muerte | Muerte | Muerte | IgIV |
| 9 | 2015 | C | 2017 | Recaída | 2017 | Pautado | - | - | 3 | Si | No | Si | Si | Si | MM |
| 10 | 2016 | R | - | - | - | - | - | - | 1 | - | - | No | Si | Si | MM |
| 11 | 2016 | R | 2017 | Pautado | - | - | - | - | 2 | Si | No | No | Si | Si | MM |
| 12 | 2017 | R | - | - | - | - | - | - | 1 | - | - | Si | No | No | AZA/ IgIV |

R: refractariedad; C: corticodependencia; I: indicación; M: mantenimiento; PS: pérdida de seguimiento; GS: glucocorticoides sistémicos; AZA: azatioprina; MM: micofenolato de mofetilo; IgIV: inmunoglobulina endovenosa.

**Tabla 5.** Complicaciones: se constataron 190 eventos en 30 pacientes (n=30/32)

| **Tipo** | **N°** |
| --- | --- |
| **Infecciones** **cutáneas**  Celulitis, tiña  Impetiginización de las erosiones de pénfigo, herpes zoster, pitiriasis versicolor ,onicomicosis ⃰  Herpes simplex, forunculosis, verrugas ⃰ | **17**  3  2  1 |
| **Infecciones** **extracutáneas**  Candidiasis oral  Neumonía  Sepsis  Queratitis herpética, herpes genital, infección urinaria, gastroenteritis, hepatitis C, bronquitis, reactivación de CMV, cuadro de vía aérea superior ⃰ | **18**  5  3  2  1 |
| **Cutáneas no infecciosas**  Estrías  Rosácea  Acné monomorfo, eritema multiforme, úlceras por decúbito, lipodermatoesclerosis aguda, caída de pelo ⃰ | **10**  3  2  1 |
| **Endocrinológicas**  Síndrome de Cushing  Hiperglucemia/diabetes  insuficiencia suprarrenal  Hiperparatiroidismo secundario | **29**  14  9  5  1 |
| **Hematológicas**  Anemia  Leucopenia  Banda monoclonal | **8**  5  2  1 |
| **Óseas/esqueléticas**  Osteoporosis/osteopenia  Fracturas vertebrales, mialgias o debilidad muscular ⃰  Artritis por cristales, artralgias ⃰ | **27**  15  5  1 |
| **Oftalmológicas**  Cataratas  Glaucoma  Xeroftalmia | **16**  11  4  1 |
| **Alteración del metabolismo lipídico**  Elevación de triglicéridos y colesterol | **11** |
| **Psiquiátricas**  Depresión  Ansiedad, angustia, psicosis ⃰ | **5**  2  1 |
| **Digestivas**  Hemorragia digestiva  Diarrea | **5**  3  2 |
| **Hepáticas**  Elevación de transaminasas de causa no infecciosa | **1** |
| **Cardiovasculares**  Hipertensión arterial  Trombosis venosa profunda  Edemas, insuficiencia cardíaca ⃰  Tromboembolismo | **16**  5  4  3  1 |
| **Renales y urológicas**  Proteinuria, insuficiencia renal ⃰  Hematuria, cristaluria, retención aguda de orina ⃰ | **7**  2  1 |
| **Alteración del medio interno**  Hipercalemia, hiponatremia, hipomagnesemia ⃰ | **3**  1 |
| **Constitucional y estado general**  Disminución de peso  Aumento de peso  Astenia, adinamia ⃰ | **11**  4  3  2 |
| **Otros**  Amenorrea, metrorragia ⃰  Hipertrofia gingival, temblor ⃰ | **6**  2  1 |
| **Total** | **190** |

⃰ Cada complicación se presenta con la frecuencia indicada en forma individual

**Tabla 6.** Diferencias por edad entre pacientes con PV (n=32)

| **N (%) o Mediana (RIC)** | | | |
| --- | --- | --- | --- |
|  | **< 40 años (n=8)** | **≥ 40 años (n=24)** | **p.** |
| **Compromiso cutáneo generalizado** | 5 (62,5) | 1 (4,2) | .003 |
| **Corticodependencia** | 1 (12,5) | 7 (29,2) | .64 |
| **Duración de tratamiento GS, meses** | 36 (20-66) | 33 (9-74) | .52 |
| **Falta de suspensión GS** | 6/8 (75) | 8/15 (53,3) | .39 |
| **Requerimiento GS y ≥ 2 ahorradores GS** | 7 (87,5) | 11 (45,8) | .05 |
| **Refractarios** | 5 (62,5) | 4 (16,7) | .02 |
| **Recaídas** | 8 (100) | 18 (75) | .30 |
| **Tiempo a la primer recaída, meses** | 10,5 (0,5-58,5) | 14 (6-23) | .78 |
| **Remisiones con/sin tratamiento** | 3 (37,5) | 12 (50) | .69 |
| **Tiempo libre de enfermedad, meses** | 3,7 (0-23,2) | 14,5 (6,9-30,5) | .38 |

RIC: rango intercuartílico; GS: glucocorticoides sistémicos
